# Supplementary material for: The economic burden of non-communicable disease mortality in the South Pacific: Evidence from Fiji
Source: PLoS One. 2020 Jul 23;15(7):e0236068. doi: 10.1371/journal.pone.0236068 (PMC7377477; doi:10.1371/journal.pone.0236068)
Supplement: S1 Data — (XLSX) [file pone.0236068.s001.xlsx]

## Sheet: Sheet1
Year	Output per Capita (Y)	Capital per Capita (K)	lnY	lnK	Secondary Schooling Gross Enrollment Rate (SEC)	Non-Communicable Disease (NCD)	Chronic Respiratory Disease (CRD)	Cardiovascular Disease (CVD)	Diabetes Mellitus (DM)	Cancer (CAN)	Government Expenditure (GOV)	Inflation Rate (INF)	Trade Openness is % of GDP (OPEN)	COUP
1972	5103.88	9180.4	8.53776	9.12483	58.8487	61.1048	12.2886	35.1747	4.73506	8.90643	14.5044	14.7254	101.072	0
1973	5580.49	9182.95	8.62703	9.1251	61.4657	53.7906	11.9134	31.1372	2.88809	7.85199	12.5333	15.9975	104.05	0
1974	5611.41	9466.75	8.63256	9.15554	64.3577	50.4537	10.98	27.7677	5.26316	6.44283	12	29.6457	103.489	0
1975	5531.52	9901.43	8.61822	9.20043	66.6161	51.2468	10.2322	25.8813	5.24506	9.88822	12.0021	24.3186	86.6287	0
1976	5577.19	11041.6	8.62644	9.30942	69.7936	56	13.4737	31.0526	3.78947	7.68421	13.6808	7.91145	80.1444	0
1977	5800.45	11482.4	8.66569	9.34857	72.7018	61.5776	8.52417	40.7125	5.85242	6.48855	15.4977	-0.0320298	90.5924	0
1978	5801.04	10822.5	8.66579	9.28938	74.0202	59.2453	9.62264	35.3774	6.13208	8.11321	16.3913	4.43188	89.718	0
1979	6382.49	11076.7	8.76131	9.3126	74.329	57.5816	12.572	31.9578	4.31862	8.73321	16.8857	8.14135	95.9751	0
1980	6144.54	11308.2	8.72332	9.33329	71.7937	57.7957	11.4695	31.0036	3.85305	11.4695	15.9297	17.3117	100.498	0
1981	6375.91	12221	8.76028	9.41091	70.3948	48.926	10.2625	23.031	3.46062	12.1718	16.3889	0.978211	100.454	0
1982	5840.04	13426.3	8.67249	9.50497	72.6344	60.7038	12.9032	31.5738	4.10557	12.1212	18.3059	12.1086	92.8681	0
1983	5468.07	14520.1	8.60668	9.58329	71.2342	59.4963	9.96852	32.319	4.51207	12.6967	20.2767	6.82635	92.6458	0
1984	5800.27	15168.7	8.66566	9.62699	71.675	59.9785	8.47639	33.9056	5.04292	12.5536	19.2112	3.0075	86.7247	0
1985	5444.87	16031.6	8.60243	9.68232	69.7216	60.4233	7.19577	35.873	5.50265	11.8519	19.1417	8.22348	89.0999	0
1986	5810.61	15552.3	8.66744	9.65196	71.443	63.0911	8.53518	33.91	7.61246	13.0334	17.3086	3.04347	81.1384	0
1987	5402.35	16762.2	8.59459	9.72688	73.5005	54.3857	12.1747	31.0994	4.17884	6.9327	17.4038	7.34001	87.3601	1
1988	5444.99	18893.3	8.60245	9.84656	71.585	68.985	7.89474	39.0038	7.04887	15.0376	14.4243	7.32802	105.442	0
1989	5836.24	19563.7	8.67184	9.88143	71.5625	64.7887	8.33333	37.0892	6.4554	12.9108	17.3228	2.8483	123.025	0
1990	6140.81	20302.4	8.72271	9.91849	72.0228	64.5631	8.33889	37.4941	6.4309	12.2992	17.4955	6.67947	129.5	0
1991	5919.4	20411.1	8.68599	9.92383	76.6985	64.3376	8.34445	37.8991	6.4064	11.6876	17.5004	5.99313	117.816	0
1992	6204.08	20501.7	8.73296	9.92826	80.7534	64.112	8.35001	38.304	6.38189	11.076	18.0145	6.26513	106.832	0
1993	6248.15	21177.3	8.74004	9.96069	75.2593	64.204	7.18002	39.4381	6.76379	10.8221	18.5022	7.23674	111.826	0
1994	6475.54	19922.7	8.77579	9.89961	76.1835	63.9277	7.39523	40.8381	7.39523	8.2991	16.3585	0.841611	115.873	0
1995	6553.29	19083	8.78772	9.85655	77.2237	65.3575	8.35851	39.3756	6.64653	10.9768	16.1103	1.1569	118.139	0
1996	6789.25	18724.6	8.8231	9.83759	77.355	64.2857	7.14286	42.7318	4.51128	9.89975	15.8663	2.89599	121.693	0
1997	6569.67	18993.1	8.79022	9.85183	76.5054	63.1861	7.5563	41.9187	3.82329	9.88787	16.788	3.45061	119.48	0
1998	6593.09	26750.1	8.79378	10.1943	78.7684	62.0866	7.96974	41.1055	3.1353	9.87598	17.3953	7.48758	119.109	0
1999	7118.32	27000.3	8.87043	10.2036	78.3449	60.987	8.38318	40.2924	2.44731	9.8641	15.8863	6.81109	122.443	0
2000	6956.52	30101.4	8.84743	10.3123	78.3441	59.8874	8.79662	39.4792	1.75932	9.85222	17.2367	-4.66653	135.422	1
2001	7069.55	33162.8	8.86355	10.4092	79.0684	66.3138	7.39327	49.2364	3.99167	5.69247	17.4208	3.36107	129.399	0
2002	7282.6	32778.6	8.89324	10.3975	82.3452	72.4352	6.60277	43.557	15.8502	6.42528	16.1249	3.31902	125.409	0
2003	7346.98	29041	8.90205	10.2765	86.0429	73.6428	7.21666	40.4297	18.9273	7.06905	16.6539	7.87383	128.114	0
2004	7720.06	26835.8	8.95158	10.1975	90.8511	75.0758	7.29185	38.8661	20.6276	8.29025	15.6322	2.23911	124.231	0
2005	7741.34	26935.5	8.95433	10.2012	84.5769	75.3743	5.82002	39.815	20.5383	9.20101	16.0492	6.81774	118.251	0
2006	7831.44	28234.2	8.9659	10.2483	91.0067	68.4545	6.70036	37.3818	14.9658	9.40659	18.2073	3.72511	117.822	1
2007	7695.98	26330.9	8.94845	10.1785	89.1514	69.697	4.69618	34.7771	19.816	10.4077	16.8881	2.95506	110.634	0
2008	7696.84	26855.1	8.94856	10.1982	87.8597	70.0742	5.72224	33.9468	20.5846	9.8206	15.0492	1.35599	130.72	0
2009	7513.3	32682.2	8.92443	10.3946	86.8752	74.3313	5.59987	40.5913	18.0354	10.1048	16.4306	1.39069	109.252	0
2010	7663.48	31822	8.94422	10.3679	88.7232	73.4024	6.11552	44.3132	13.0561	9.91749	16.876	4.22979	121.731	0
2011	7806.02	30485.6	8.96265	10.325	90.947	75.3645	5.63655	34.9617	23.8539	10.9124	17.3214	9.39134	128.037	0
2012	7857.19	30708.3	8.96918	10.3323	88.7216	72.7852	5.83704	33.5407	23.1556	10.2519	18.7284	3.57651	124.65	0
2013	8171.93	32094.8	9.00846	10.3764	88.8168	73.2315	5.10013	35.8018	21.2649	11.0647	18.9379	3.6213	128.532	0
2014	8570.51	33600.6	9.05608	10.4223	89.3022	71.7627	5.74563	34.8924	21.1491	9.97546	20.0863	3.85266	115.921	0
2015	8836.71	38984.1	9.08667	10.5709	89.4469	71.9797	5.1884	33.8965	21.8451	11.0496	20.8579	4.12739	105.511	0
2016	8805.05	40052.3	9.08308	10.5979	89.0719	72.0975	5.07066	36.1457	20.0471	10.834	24.0981	6.53505	77.9877	0
